# Supplementary material for: Impact of the COVID-19 Lockdown in a European Regional Monitoring Network (Spain): Are We Free from Pollution Episodes?
Source: Int J Environ Res Public Health. 2021 Oct 20;18(21):11042. doi: 10.3390/ijerph182111042 (PMC8583473; doi:10.3390/ijerph182111042)
Supplement: Supplementary file 1 [file ijerph-18-11042-s001.zip › ijerph-1375781-supplementary.pdf]

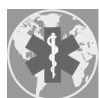

# Impact of the COVID-19 Lockdown in a European Regional Monitoring Network (Spain): Are We Free from Pollution Episodes?

Gotzon Gangoiti \*, Maite de Blas, Maria Carmen Gómez, Ana Rodríguez-García, Eduardo Torre-Pascual, Estíbaliz García-Ruiz, Estíbaliz Sáez de Cámara, Iñaki Zuazo, José Antonio García and Verónica Valdenebro

Faculty of Engineering, University of the Basque Country UPV/EHU, 48013 Bilbao, Spain;

\* Correspondence: g.gangoiti@ehu.eus; Tel.: +34-94-601-4088; Fax: +34-94-601-7800

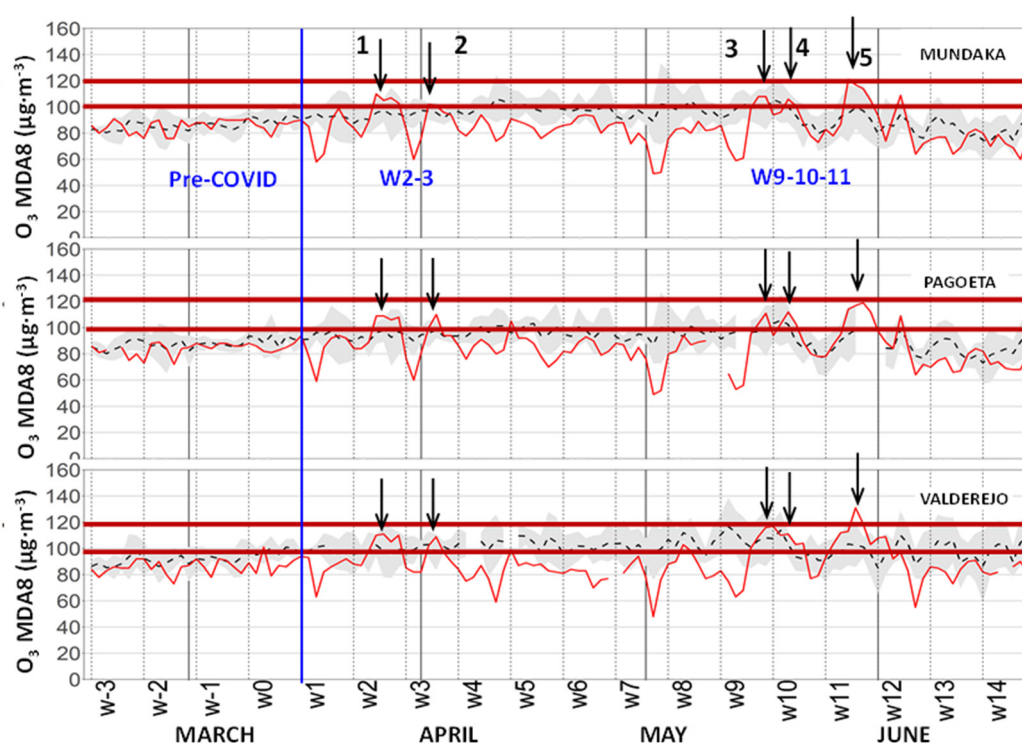

**Figure S1:** As in Figure 7, MDA8 ozone daily series during a pre-COVID19 four-week period the lockdown period (solid red line) and during in the three background rural sites, together with the inter-annual averages (dashed lines) and their standard deviations (grey shading). The five simultaneous O<sub>3</sub> exceedances (marked with arrows) of the WHOAQG of 100 µg·m<sup>-3</sup> are also detected in the three rural sites.

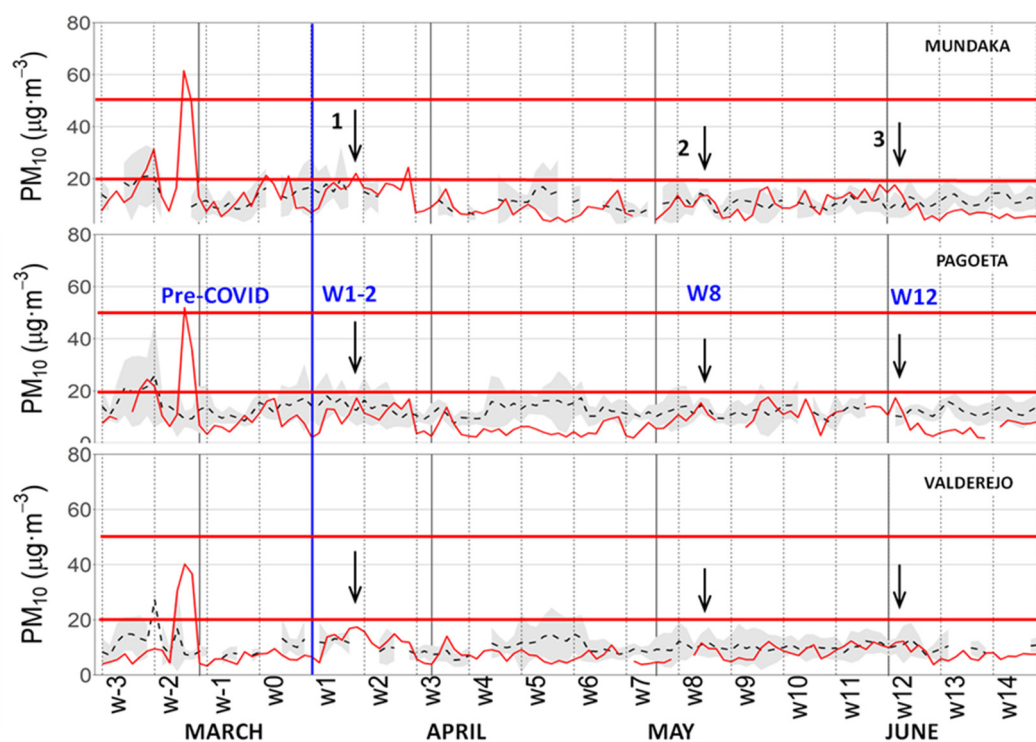

**Figure S2.** As in Figure 8, 24-hour average concentration series of  $PM_{10}$  during pre-COVID four-week period and the lockdown period (solid red line) in the three background rural sites, together with the inter-annual averages (dashed lines) and their standard deviations (grey shading). The  $PM_{10}$  episodes observed in the urban sites (marked with arrows) above the WHOAQG reference level of  $20 \mu g \cdot m^{-3}$  are not detected in the rural sites.

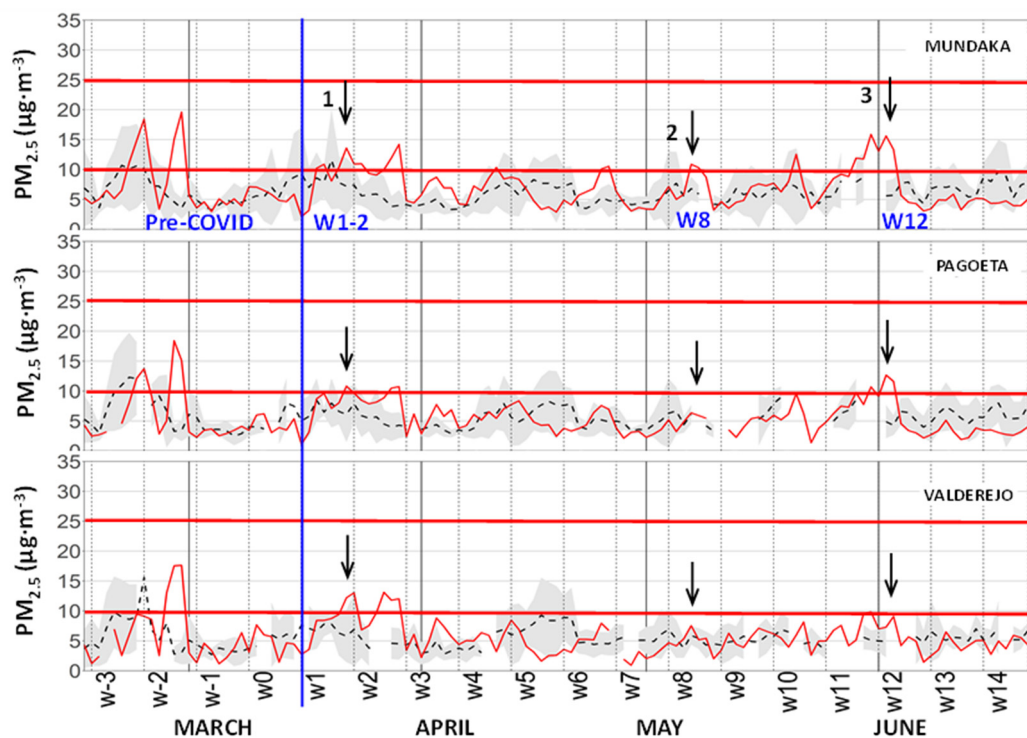

**Figure S3.** As in Figure 9, 24-hour average concentration series of  $PM_{2.5}$  during a pre-COVID four-week period and the lockdown period (solid red line) in the three background rural sites, together with their inter-annual averages (dashed lines) and standard deviations (grey shading). The same three  $PM_{10}$  episodes marked in Figure 8 and 9 (arrows) can also be detected in these  $PM_{2.5}$  series (above the WHOAQG of  $10 \mu g \cdot m^{-3}$ ), but not in all three rural sites.
